# Supplementary material for: Templated Assembly of Collagen Fibers Directs Cell Growth in 2D and 3D
Source: PubMed Central journal article supplement (PMC5575125; doi:10.1038/s41598-017-10182-8), 2017-08-29
Supplement: 41598_2017_10182_MOESM1_ESM.pdf [file 41598_2017_10182_MOESM1_ESM.pdf]

## **Supplementary Information**

### **Templated Assembly of Collagen Fibers Directs Cell Growth in 2D and 3D**

G.Y. Liu<sup>1</sup>, R. Agarwal<sup>1</sup>, K.R Ko<sup>1</sup>, M. Ruthven<sup>1</sup>, H.T. Sarhan<sup>1</sup>, and J.P. Frampton<sup>1</sup>

<sup>1</sup>School of Biomedical Engineering, Dalhousie University, Halifax, Nova Scotia Canada

#### **To whom correspondence should be addressed:**

John P. Frampton, PhD

School of Biomedical Engineering

Dalhousie University

Halifax, NS, Canada B3H 4R2

Email: [john.frampton@dal.ca](mailto:john.frampton@dal.ca)

Phone: 902-494-4175

## Supplementary Methods

### *Aniline Blue Staining*

Formalin-fixed collagen networks were incubated in a solution of 2.5% phosphotungstic acid/2.5% phosphomolybdic acid in distilled water for 10 minutes. The collagen networks were then stained using a 2.5% solution of aniline blue in 1% acetic acid for 5 minutes. The collagen networks were rinsed in distilled water, cleared in 1% acetic acid, and rinsed again in distilled water before imaging by brightfield microscopy.

### *Image Analysis*

Fiber diameter, density (number of fiber/ROI) and pore size of dry and hydrated collagen fabrics were determined by analyzing stereomicroscope images using Fiji. A 1.2 mm x 1.2 mm region of interest (ROI) was selected at the center of each image. Wet and dry fiber diameters, densities and pore sizes within the ROIs were measured. Mean fiber density and diameter  $\pm$  the standard error of the mean were graphed as a function of collagen mass fraction. For analysis of fiber orientation, thresholded images of dry fabrics and C1A1 immunofluorescence were processed using the OrientationJ plugin for Fiji<sup>1</sup>.

<sup>1</sup>Z. Püspöki, M. Storath, D. Sage, M. Unser, "Transforms and Operators for Directional Bioimage Analysis: A Survey," *Advances in Anatomy, Embryology and Cell Biology*, vol. 219, Focus on Bio-Image Informatics, Springer International Publishing, ch. 3, pp. 69-93, May 21, 2016.

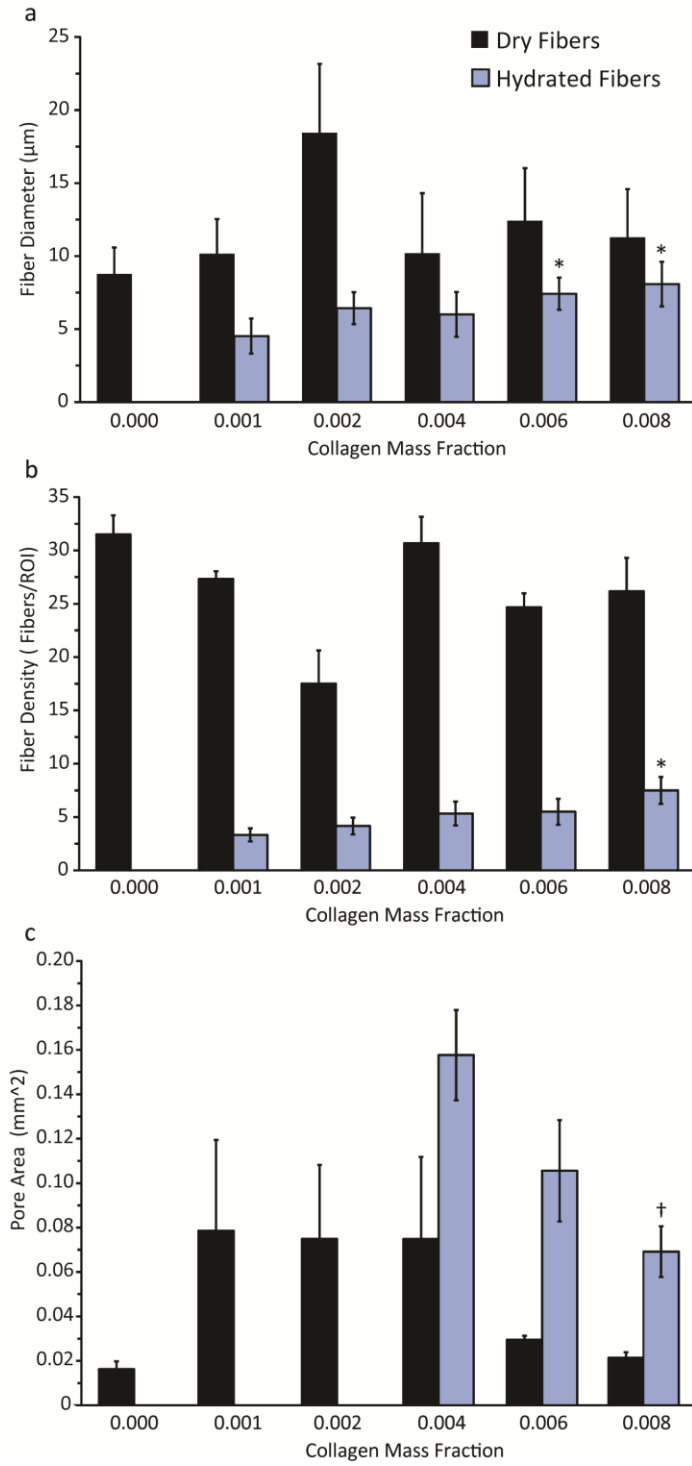

**Supplementary Figure 1. Analysis of fibers before and after hydration.** (a) Hydrated collagen fiber diameter increases slightly with increasing collagen mass fraction. (b) The density of hydrated fibers (number of fibers per ROI; ROI=1.45 mm<sup>2</sup>) increases with increasing collagen mass fraction. (c) The pore size of the hydrated material decreases with increasing collagen mass fraction, presumably due to the higher density of fibers that remain upon rehydration. Pore size could not be calculated for the 0.001 and 0.002 samples due to the low numbers of fibers that formed under these conditions. Fabrics without collagen do not produce fibers. Data are presented as mean values  $\pm$  the standard error of the mean. Significant differences from the 0.001 mass fraction for hydrated fibers are indicated by \*. Significant differences from the 0.004 mass fraction for hydrated fibers are indicated by †. Significant differences were observed for fiber diameter, density and pore size between dry and hydrated fibers. One-way ANOVA with the Tukey post-hoc test was used to determine statistical significance within the dry and hydrated groups. Two-way ANOVA was used to determine statistical significance between the dry and hydrated groups.  $p < 0.05$  was considered significant.

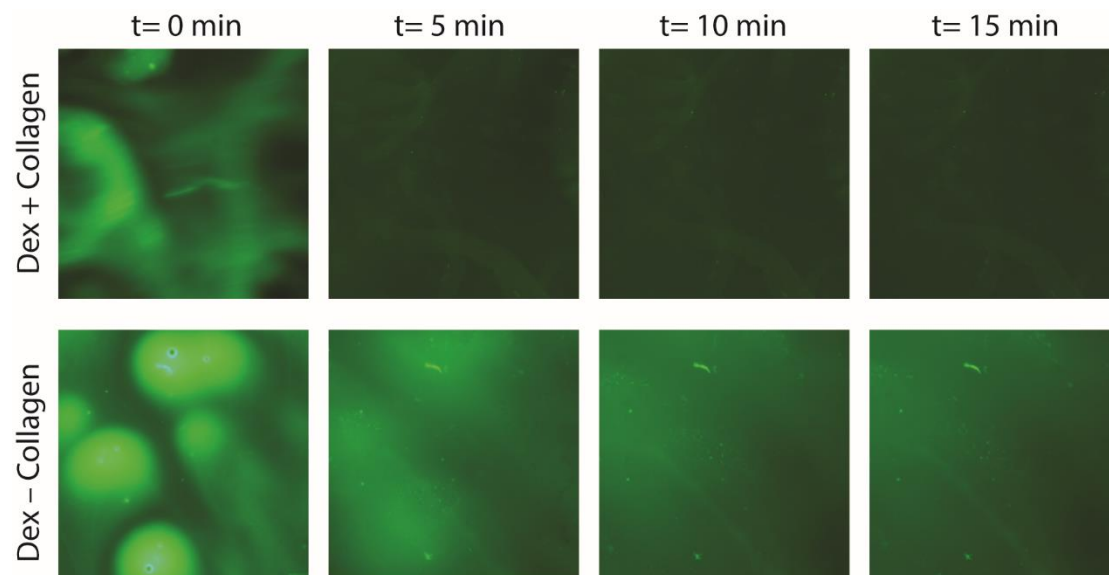

**Supplementary Figure 2. Dextran dissolves rapidly following fabric hydration.** Dextran completely dissolves in the liquid medium over approximately 15 minutes for both control fabrics (no collagen) and collagen-doped dextran fabrics.

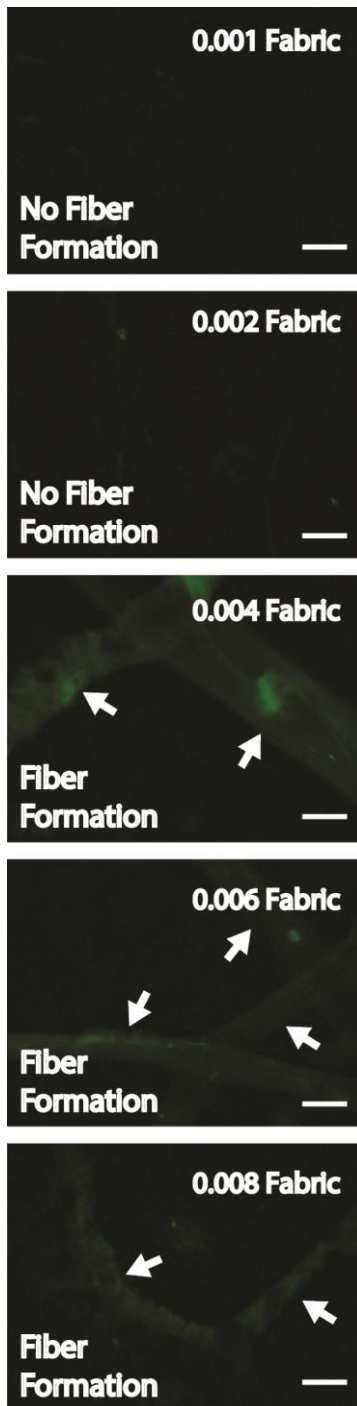

**Supplementary Figure 3. Effect of collagen mass fraction on collagen fiber integrity.** Mass fractions of collagen of 0.004 or greater form robust collagen fiber networks that display C1A1 immunofluorescence. Delicate fibers form sporadically for lower mass fractions of collagen. Scale, 20  $\mu\text{m}$ . Arrows indicate locations of fibers in the images.

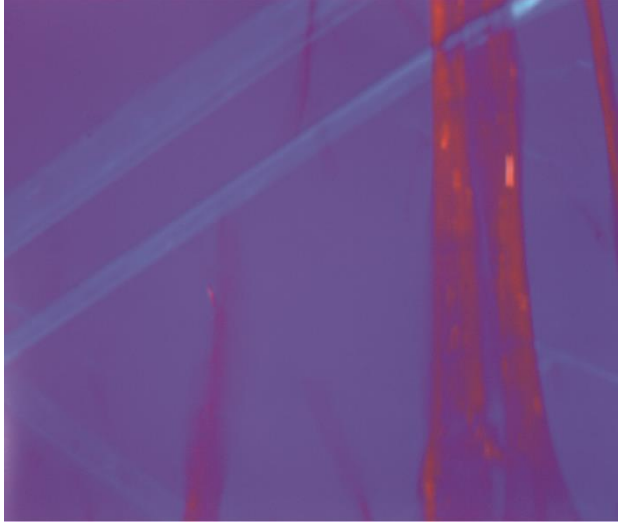

**Supplementary Figure 4. Representative image of collagen fiber birefringence.** Fibers with different orientations display differential refractive characteristics when subjected to polarized illumination.

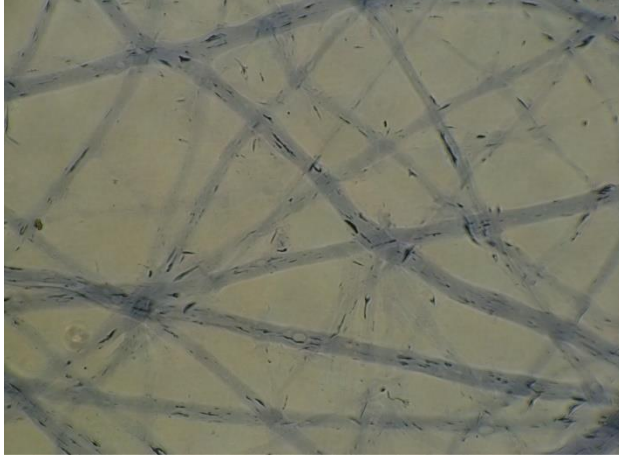

**Supplementary Figure 5. Aniline blue staining of a hydrated collagen network.** Staining for Aniline blue, the component of the Masson's trichrome stain responsible for staining collagen, demonstrates that the fibers formed following dextran dissolution are highly enriched in collagen.



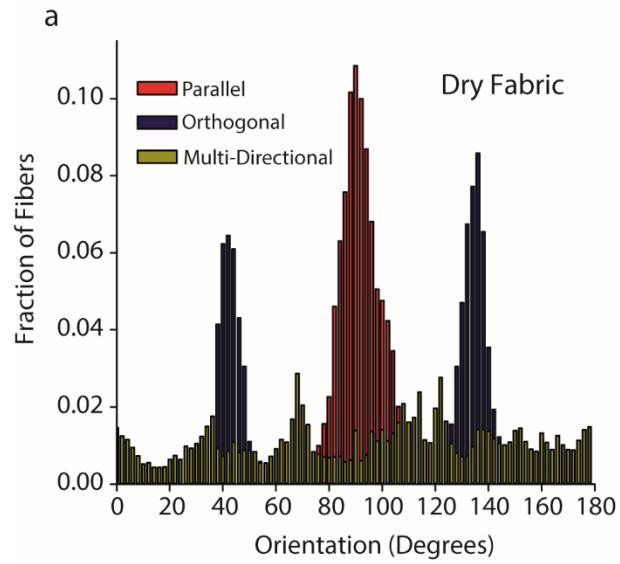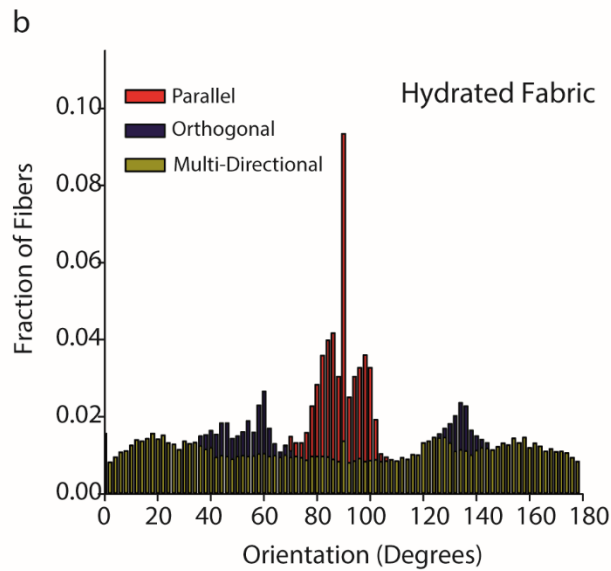

**Supplementary Figure 6. Analysis of fiber orientation before and after cell culture. (a)**

Histogram of fiber orientation for parallel, orthogonal, and multi-direction fibers before hydration. **(b)** Histogram of fiber orientation after hydration and cell culture quantified from C1A1 images.

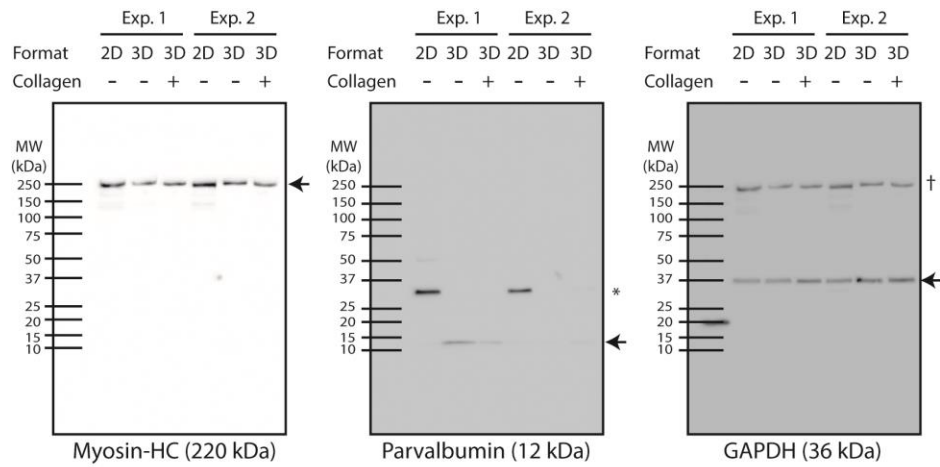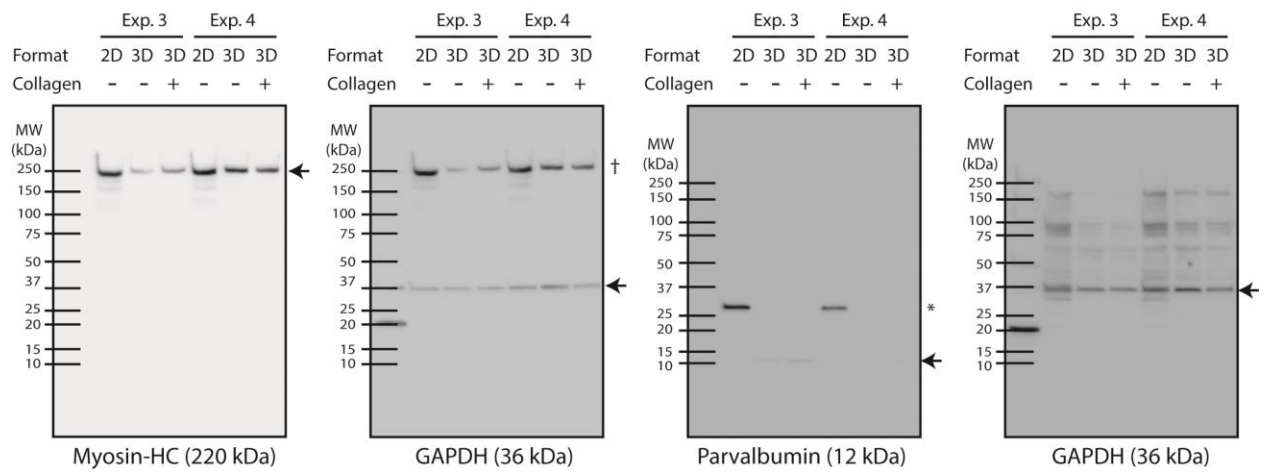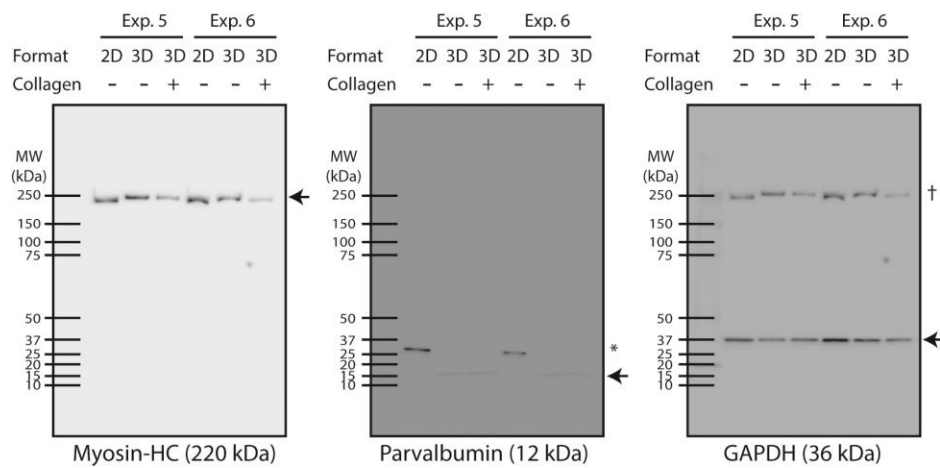

**Supplementary Figure 7. Raw Western blot data for the 6 experiments conducted to measure levels of differentiation markers under 2D and 3D growth conditions.** Arrows indicate locations of bands of interest. Locations of non-specific bands for parvalbumin under 2D conditions are indicated by \*. Bands present from residual myosin heavy chain on reprobed blots are indicated by †. For experiments 4 and 5, myosin heavy chain and parvalbumin were blotted from separate gels (corresponding reprobed GAPDH blots are provided). All other experiments were probed, stripped and reprobed in the following order: myosin heavy chain, parvalbumin and GAPDH. Links to relevant product data from Novus Biologicals are provided below.

Myosin heavy chain antibody: [https://www.novusbio.com/products/myosin-heavy-chain-antibody-mf20\\_mab4470](https://www.novusbio.com/products/myosin-heavy-chain-antibody-mf20_mab4470)

Parvalbumin antibody: <https://www.novusbio.com/PDFs/NB120-11427.pdf>

GAPDH antibody: [https://www.novusbio.com/products/gapdh-antibody-2d4a7\\_nb300-328](https://www.novusbio.com/products/gapdh-antibody-2d4a7_nb300-328)

**Supplementary Table 1. Densitometry data for myosin heavy chain and parvalbumin.**

**Myosin-HC (MHC)**

|               | <b>MHC<br/>Exp. 1</b> | <b>GAPDH<br/>Exp. 1</b> | <b>MHC/GAPDH<br/>Exp. 1</b> | <b>MHC<br/>Exp. 2</b> | <b>GAPDH<br/>Exp. 2</b> | <b>MHC/GAPDH<br/>Exp. 2</b> |
|---------------|-----------------------|-------------------------|-----------------------------|-----------------------|-------------------------|-----------------------------|
| <b>2D</b>     | 5563.861              | 3600.619                | 1.545251247                 | 6383.569              | 4124.083                | 1.547875976                 |
| <b>3D (-)</b> | 2857.841              | 3636.205                | 0.785940562                 | 4290.376              | 6500.619                | 0.659994994                 |
| <b>3D (+)</b> | 3600.134              | 4944.79                 | 0.728066106                 | 3431.669              | 6342.205                | 0.541084528                 |
|               | <b>MHC<br/>Exp. 3</b> | <b>GAPDH<br/>Exp. 3</b> | <b>MHC/GAPDH<br/>Exp. 3</b> | <b>MHC<br/>Exp. 4</b> | <b>GAPDH<br/>Exp. 4</b> | <b>MHC/GAPDH<br/>Exp. 4</b> |
| <b>2D</b>     | 8762.439              | 3579.861                | 2.447703696                 | 10205.217             | 5197.104                | 1.963635325                 |
| <b>3D (-)</b> | 1695.134              | 2799.79                 | 0.605450409                 | 7425.296              | 6655.518                | 1.115660118                 |
| <b>3D (+)</b> | 3598.74               | 3200.79                 | 1.124328681                 | 5770.104              | 3665.447                | 1.57418836                  |
|               | <b>MHC<br/>Exp. 5</b> | <b>GAPDH<br/>Exp. 5</b> | <b>MHC/GAPDH<br/>Exp. 5</b> | <b>MHC<br/>Exp. 6</b> | <b>GAPDH<br/>Exp. 6</b> | <b>MHC/GAPDH<br/>Exp. 6</b> |
| <b>2D</b>     | 5575.347              | 3163.719                | 1.762276296                 | 9018.539              | 5317.326                | 1.696066594                 |
| <b>3D (-)</b> | 8544.054              | 2401.184                | 3.558267088                 | 7431.104              | 3488.962                | 2.129889635                 |
| <b>3D (+)</b> | 4828.033              | 3504.548                | 1.377647845                 | 3698.376              | 3626.619                | 1.019786198                 |

**Parvalbumin**

|               | <b>Parv.<br/>Exp. 1</b> | <b>GAPDH<br/>Exp. 1</b> | <b>Parv./GAPDH<br/>Exp. 1</b> | <b>Parv.<br/>Exp. 2</b> | <b>GAPDH<br/>Exp. 2</b> | <b>Parv./GAPDH<br/>Exp. 2</b> |
|---------------|-------------------------|-------------------------|-------------------------------|-------------------------|-------------------------|-------------------------------|
| <b>2D</b>     | 313.506                 | 3600.619                | 0.087070029                   | 126.021                 | 4124.083                | 0.030557338                   |
| <b>3D (-)</b> | 5123.79                 | 3636.205                | 1.409103722                   | 31.95                   | 6500.619                | 0.004914917                   |
| <b>3D (+)</b> | 1299.062                | 4944.79                 | 0.26271328                    | 436.042                 | 6342.205                | 0.068752429                   |
|               | <b>Parv.<br/>Exp. 3</b> | <b>GAPDH<br/>Exp. 3</b> | <b>Parv./GAPDH<br/>Exp. 3</b> | <b>Parv.<br/>Exp. 4</b> | <b>GAPDH<br/>Exp. 4</b> | <b>Parv./GAPDH<br/>Exp. 4</b> |
| <b>2D</b>     | 110.021                 | 5106.861                | 0.021543762                   | 76.364                  | 5389.497                | 0.01416904                    |
| <b>3D (-)</b> | 2842.719                | 4394.397                | 0.646896264                   | 273.092                 | 6156.983                | 0.044354841                   |
| <b>3D (+)</b> | 4831.083                | 3864.912                | 1.249985252                   | 738.698                 | 4225.154                | 0.174833391                   |
|               | <b>Parv.<br/>Exp. 5</b> | <b>GAPDH<br/>Exp. 5</b> | <b>Parv./GAPDH<br/>Exp. 5</b> | <b>Parv.<br/>Exp. 6</b> | <b>GAPDH<br/>Exp. 6</b> | <b>Parv./GAPDH<br/>Exp. 6</b> |
| <b>2D</b>     | 65.364                  | 3163.719                | 0.020660495                   | 77.778                  | 5317.326                | 0.014627277                   |
| <b>3D (-)</b> | 3731.083                | 2401.184                | 1.55385135                    | 4545.154                | 3488.962                | 1.302723847                   |
| <b>3D (+)</b> | 5332.619                | 3504.548                | 1.521628181                   | 3152.447                | 3626.619                | 0.869252326                   |
